# Supplementary material for: Unexpected ring closures leading to 2-N,N-dialkylaminoareno[1,3]tellurazoles
Source: Royal Society of Chemistry journal article supplement (doi:10.1039/d2nj03234a), 2022-01-01
Supplement: d2nj03234a1.pdf [file d2nj03234a1.pdf]

## Supplemental Information New Journal of Chemistry

### Unexpected Ring Closures Leading to 2-N,N-Dialkylamino-1,3-benzotellurazoles

Johan Pierre<sup>a</sup>, Zachary M. Hill<sup>b</sup>, Frank R. Fronczek<sup>c</sup> and Thomas Junk<sup>b\*</sup>

<sup>a</sup>Department of Chemistry, University of Poitiers, 86073 Poitiers Cedex 9, France

<sup>b</sup>Department of Chemistry, University of Louisiana at Lafayette, Lafayette, Louisiana 70504, U.S.A.

<sup>c</sup>Department of Chemistry, Louisiana State University, Baton Rouge, Louisiana 70803, U.S.A.

E-mail: [thomas.junk@louisiana.edu](mailto:thomas.junk@louisiana.edu)

#### 2-(N,N-Dimethylamino) benzo[1,3]tellurazole (1)

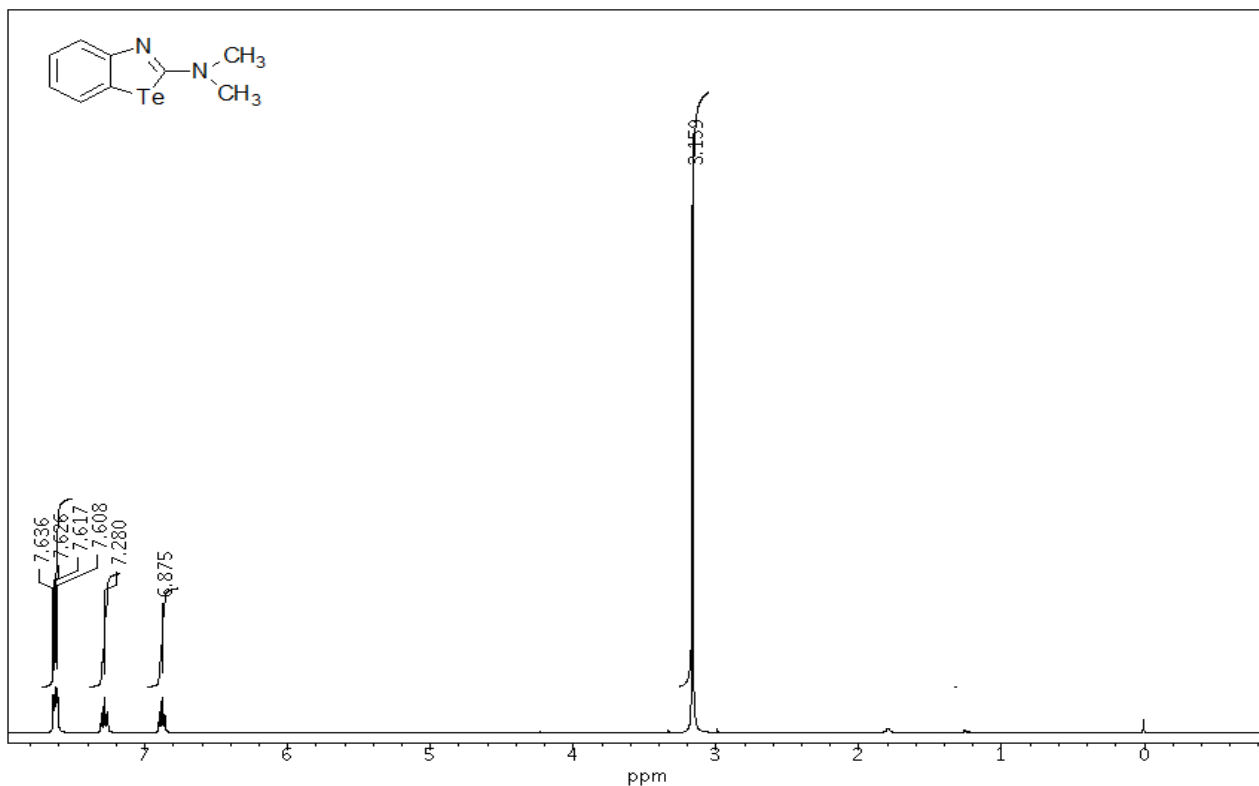

<sup>1</sup>H NMR spectrum of **1**, 400 MHz, CDCl<sub>3</sub>

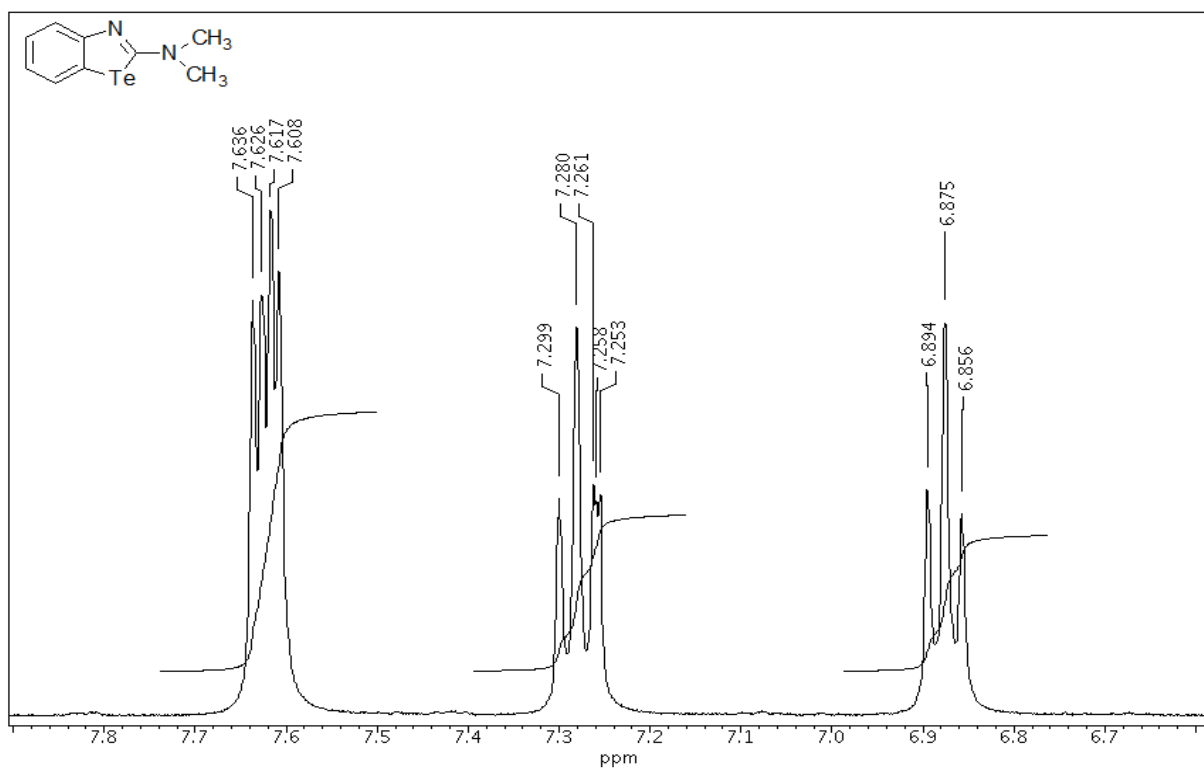

<sup>1</sup>H NMR spectrum of **1**, aromatic region

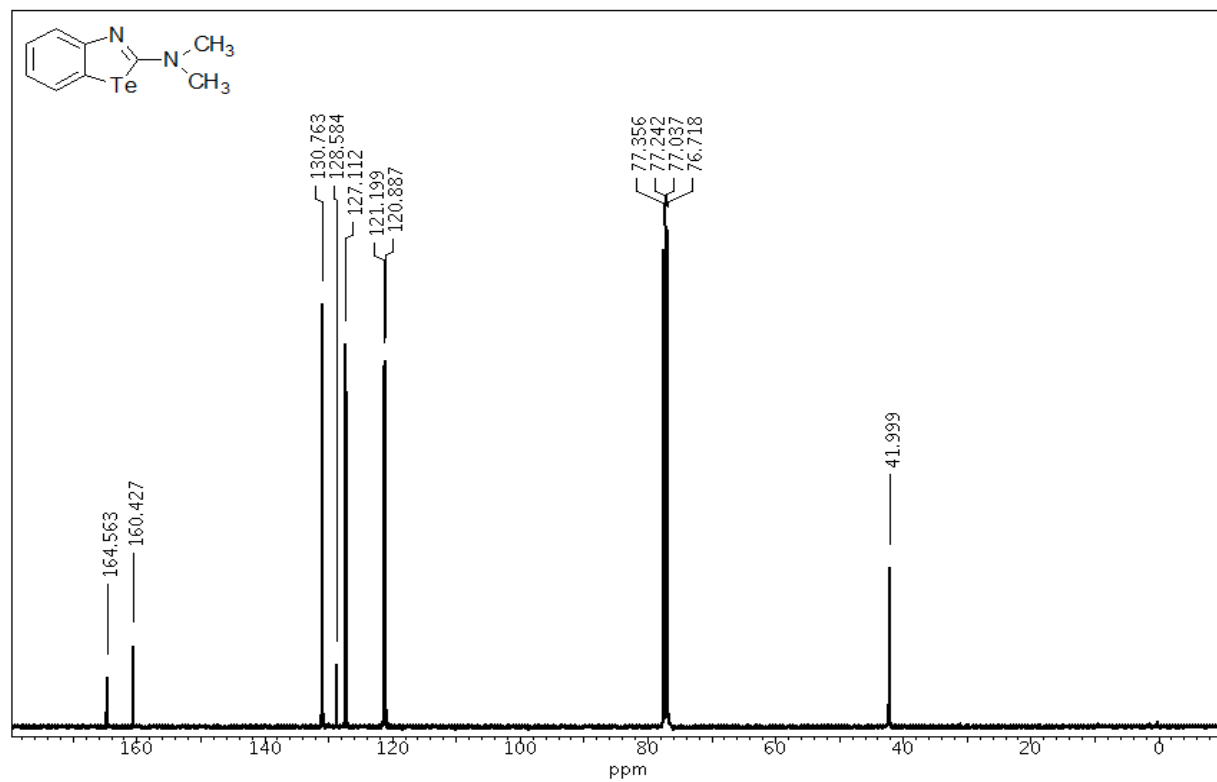

<sup>13</sup>C NMR spectrum of **1**

**2-(N,N-Diethylamino)benzo[1,3]tellurazole (2)**

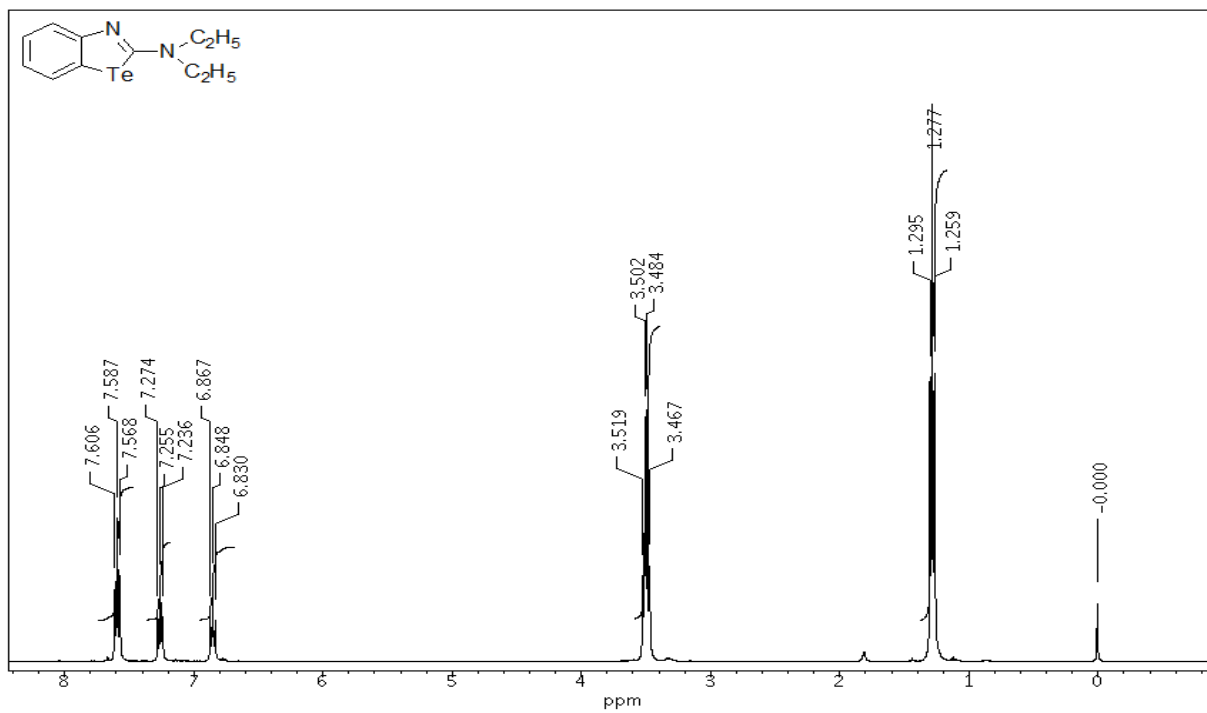

<sup>1</sup>H NMR spectrum of **2**, 400 MHz, CDCl<sub>3</sub>

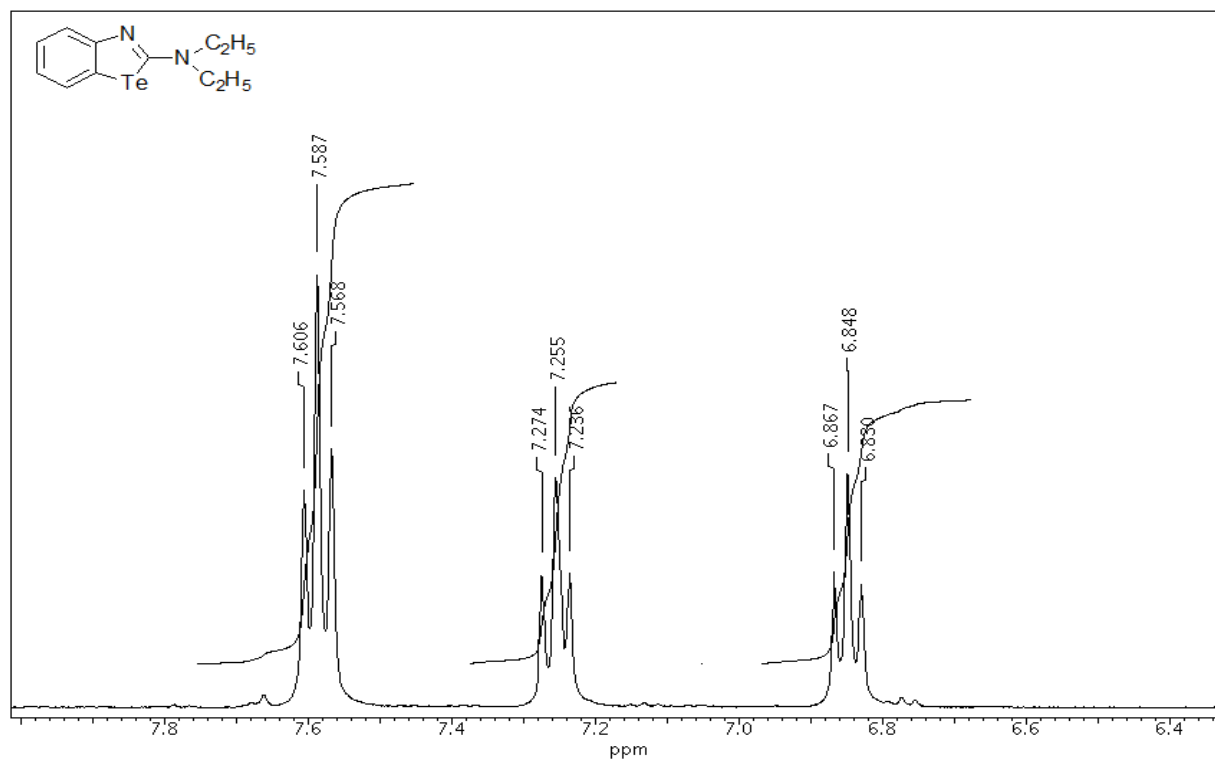

<sup>1</sup>H NMR spectrum of **2**, aromatic region

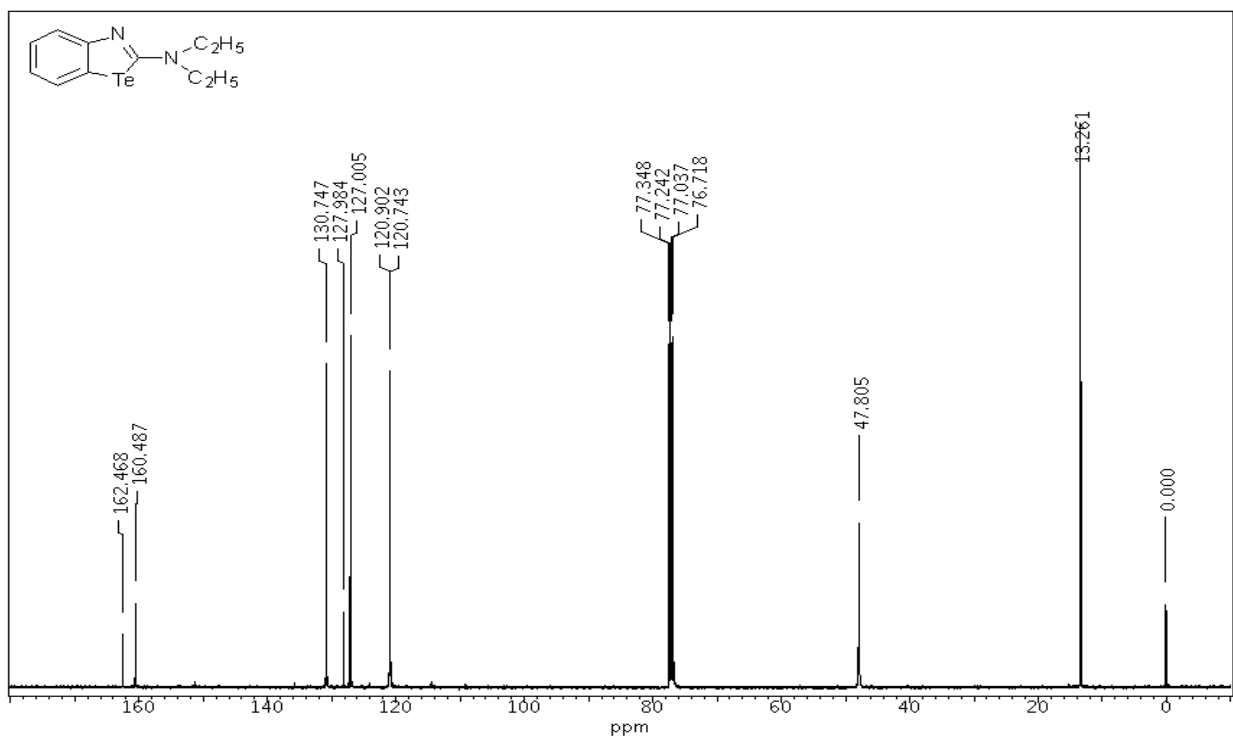

<sup>13</sup>C NMR spectrum of **2**

**2-(N,N-Dimethylamino)-6-methylbenzo[1,3]tellurazole (3)**

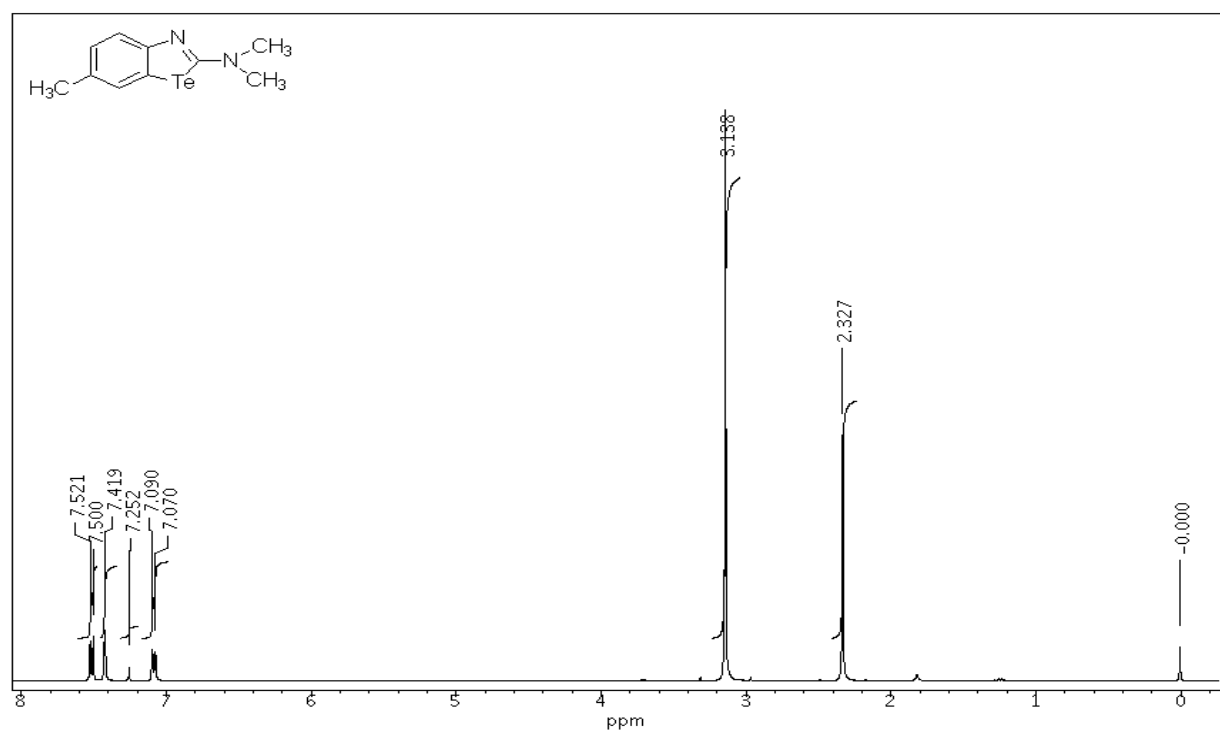

<sup>1</sup>H NMR spectrum of **3**, 400 MHz, CDCl<sub>3</sub>

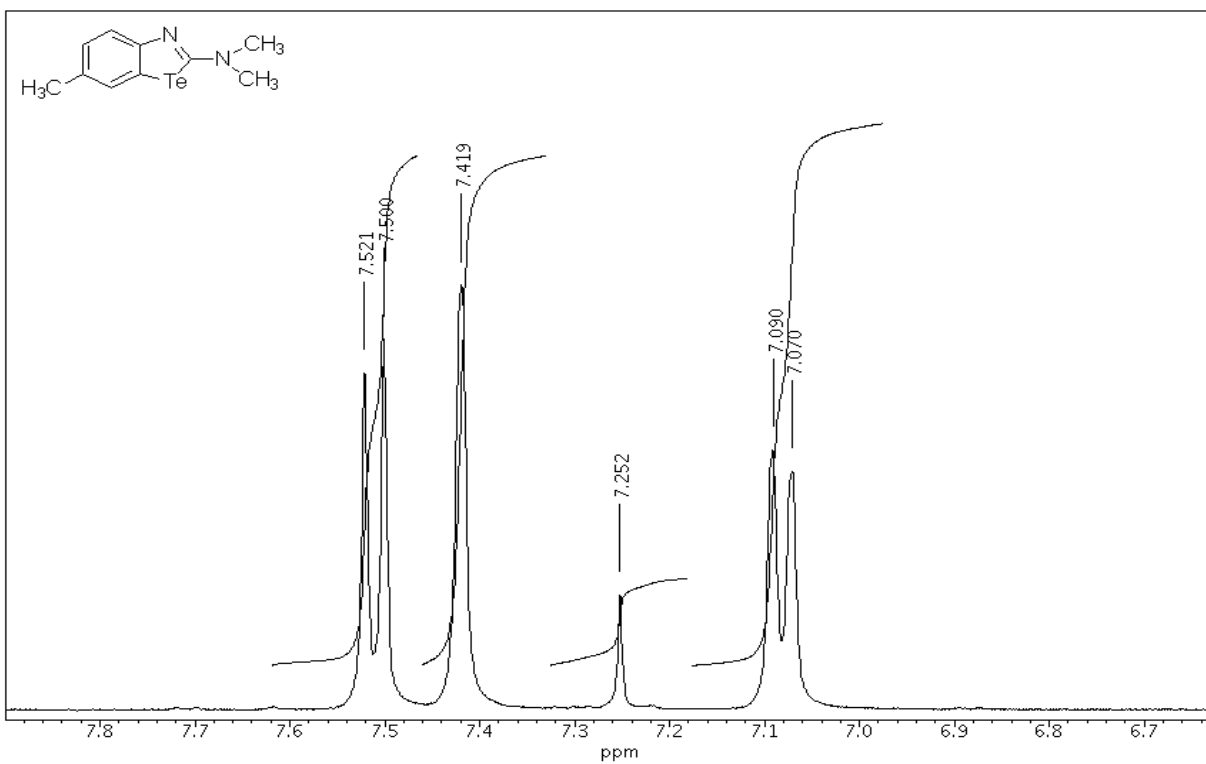

<sup>1</sup>H NMR spectrum of 3, aromatic region

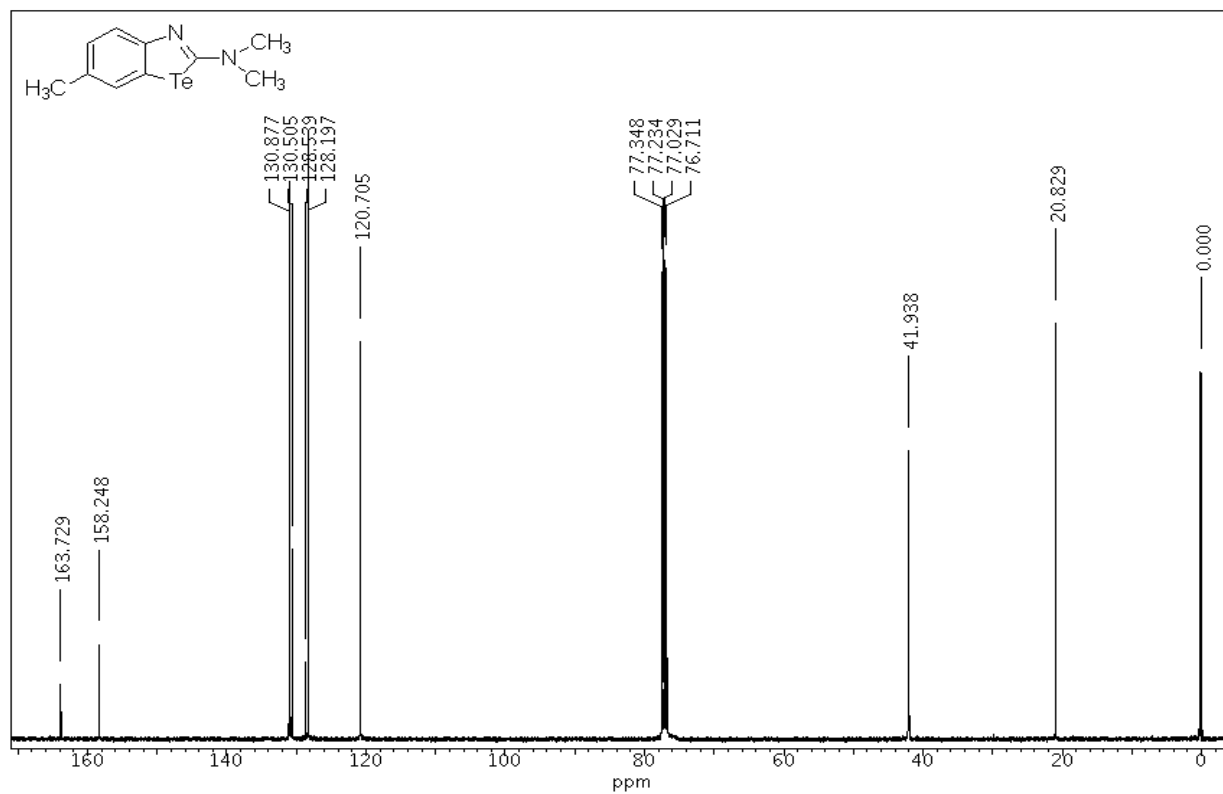

<sup>13</sup>C NMR spectrum of 3

**2-(N,N-Dimethylamino)-6-chlorobenzo[1,3]tellurazole (4)**

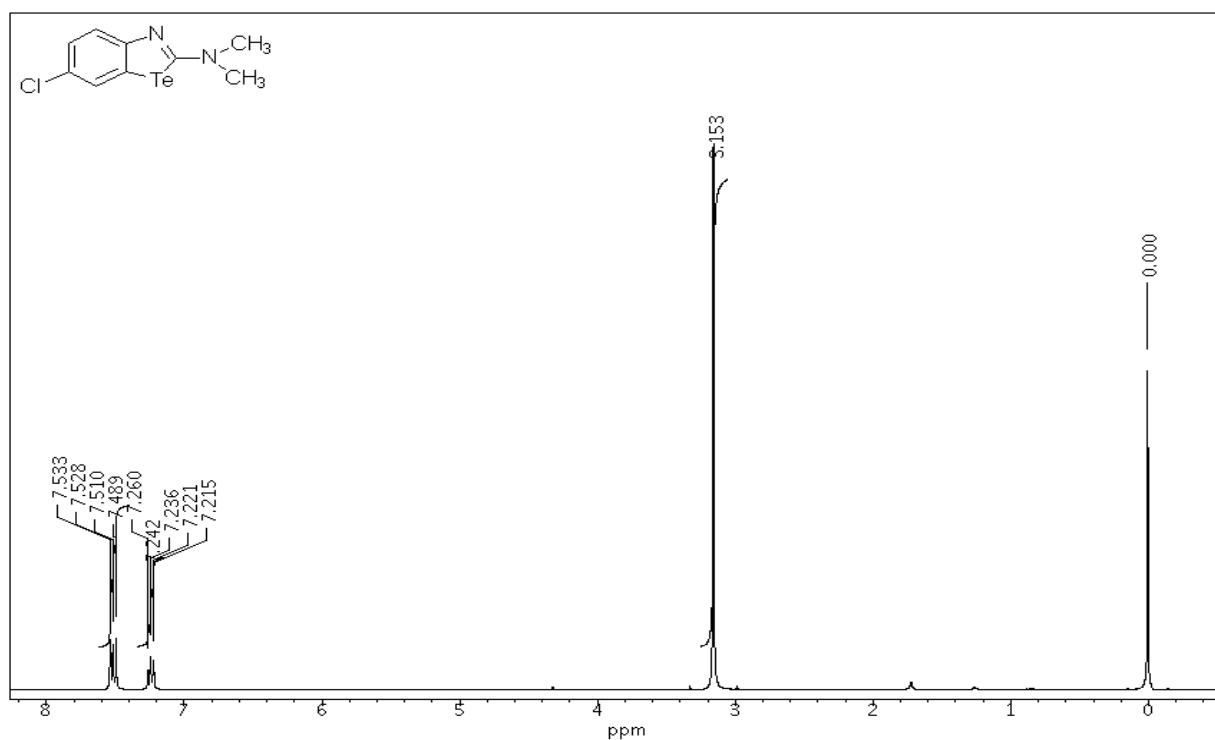

<sup>1</sup>H NMR spectrum of 4, 400 MHz, CDCl<sub>3</sub>

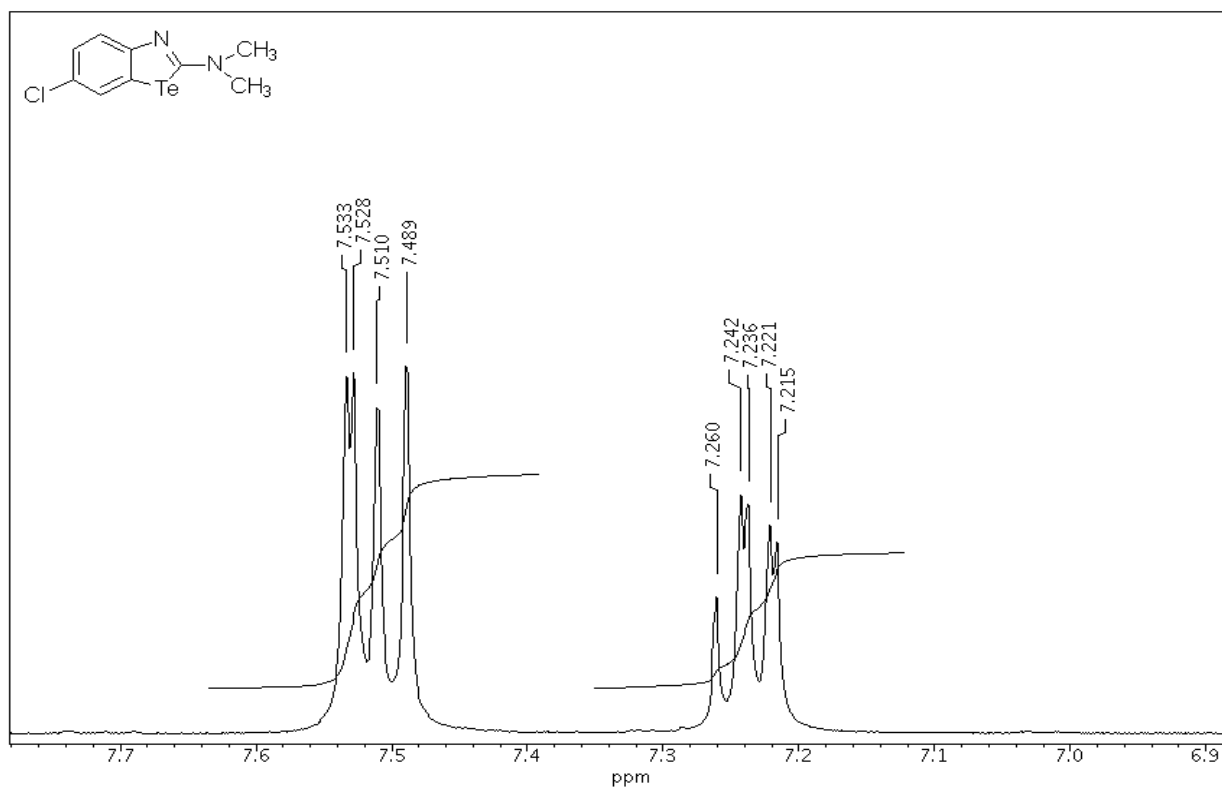

<sup>1</sup>H NMR spectrum of 4, aromatic region

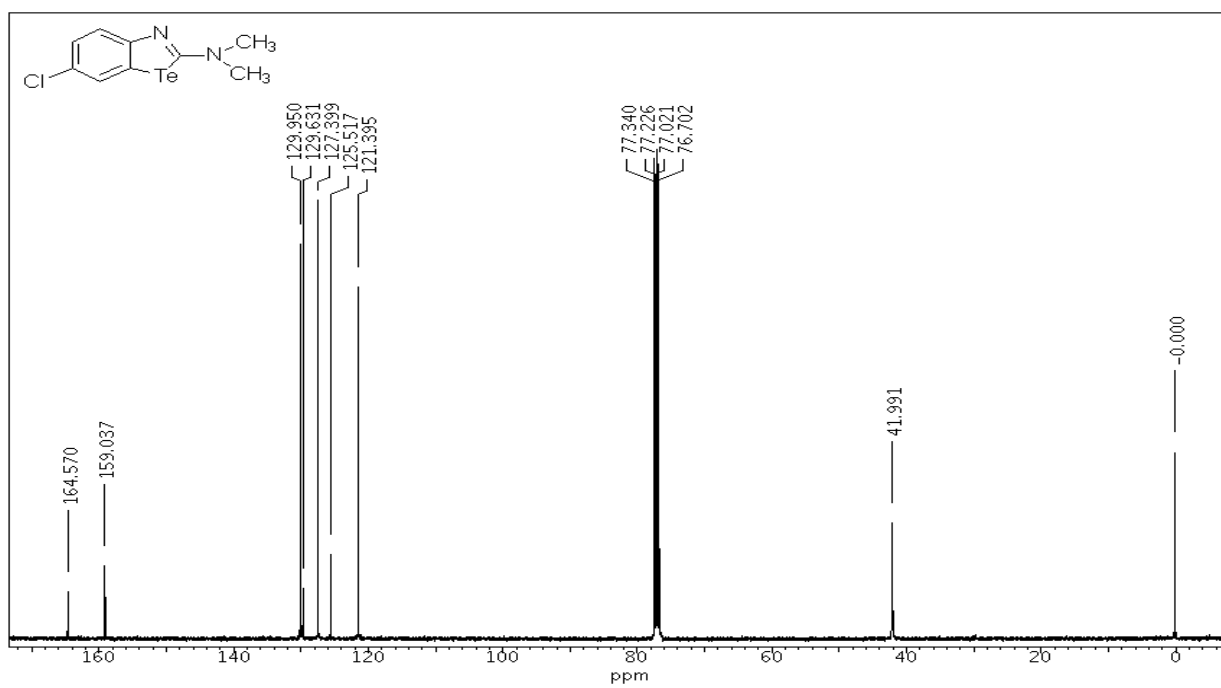

$^{13}\text{C}$  NMR spectrum of **4**

**2-(N,N-Dimethylamino)-4,6-dimethylbenzo[1,3]tellurazole (**5**)**

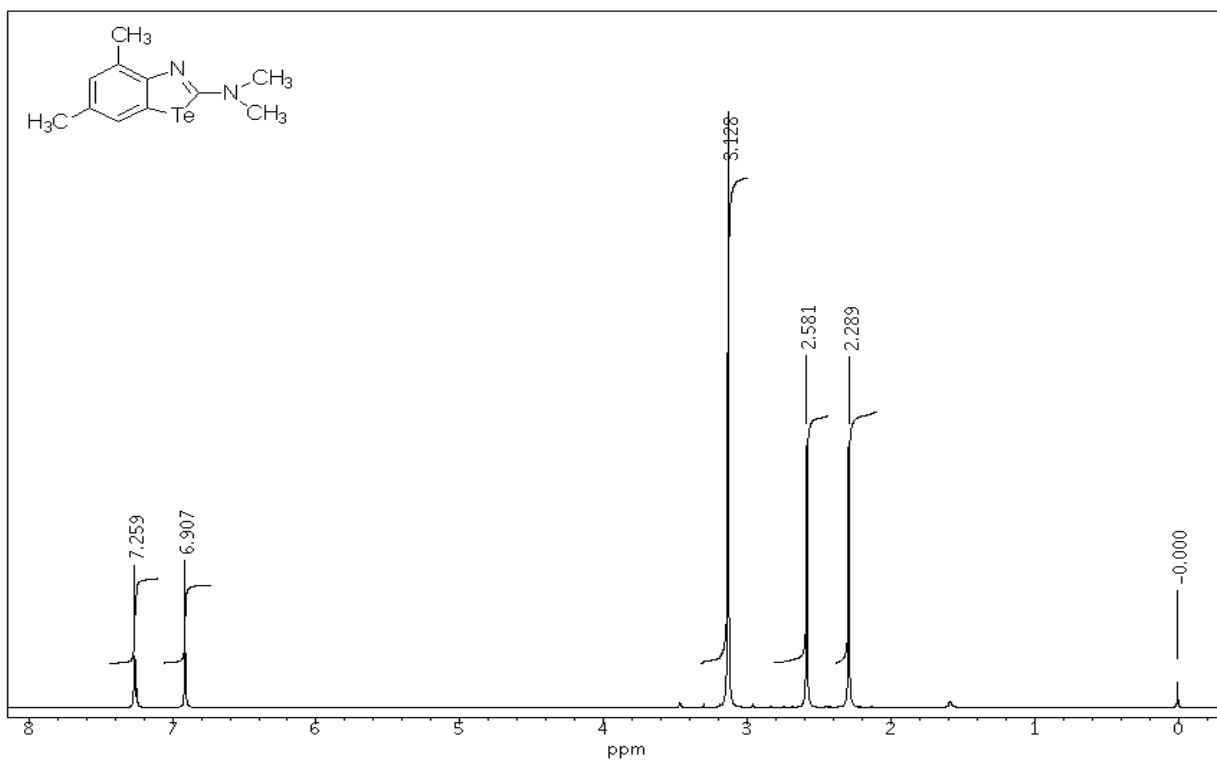

$^1\text{H}$  NMR spectrum of **5**, 400 MHz,  $\text{CDCl}_3$

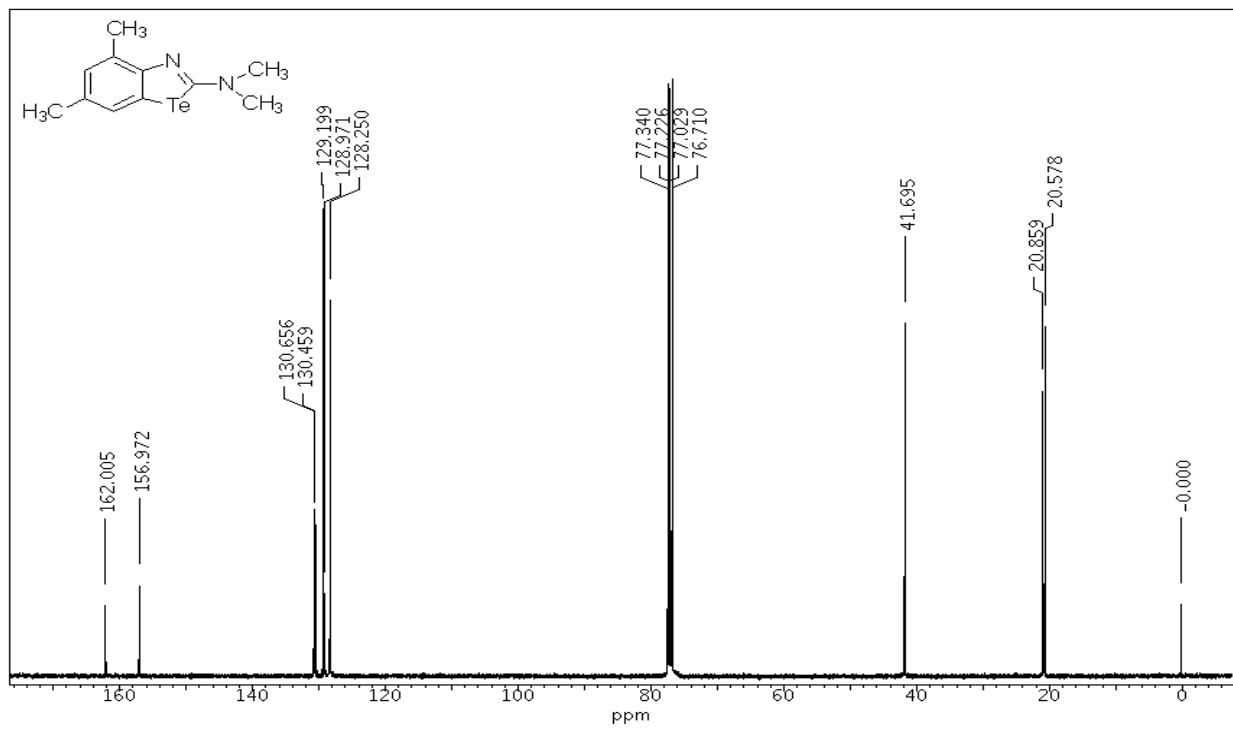

<sup>13</sup>C NMR spectrum of 5

**2-(N,N-Dimethylamino)-6-chlorobenzo[1,3]tellurazole (6)**

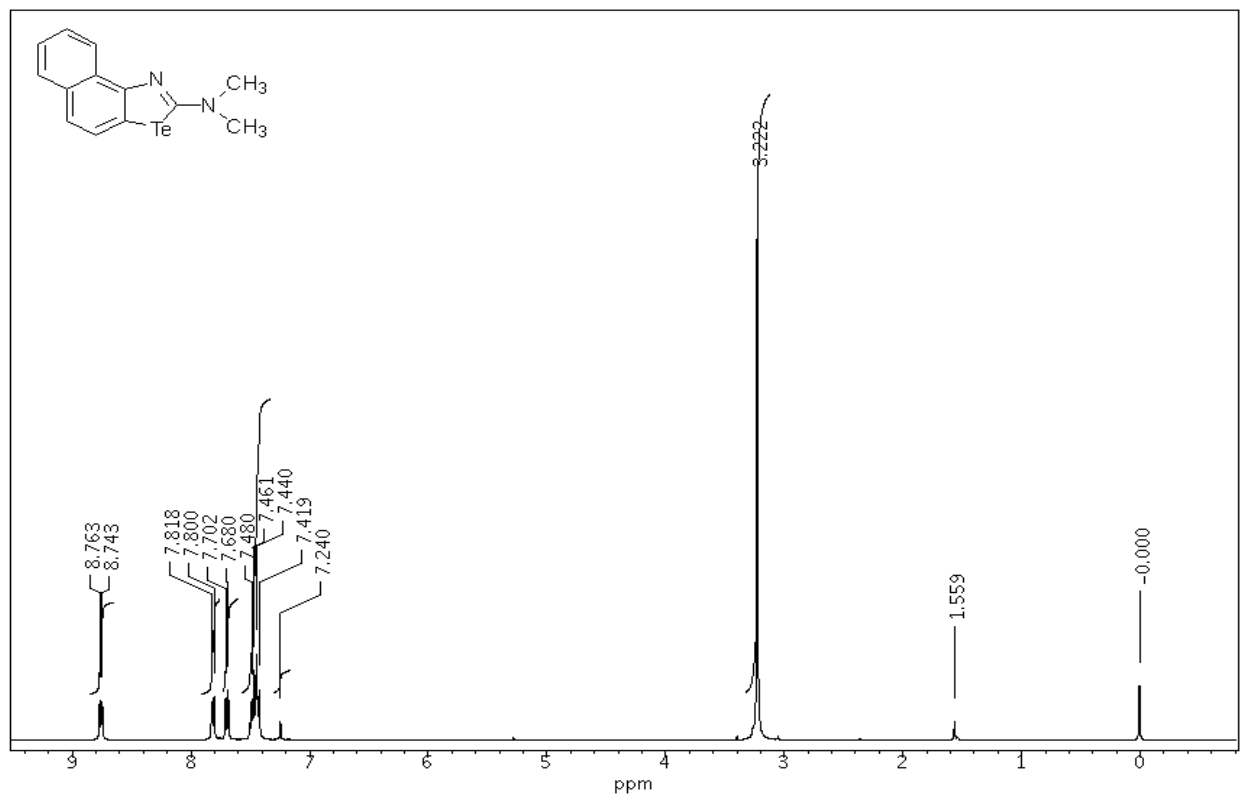

<sup>1</sup>H NMR spectrum of 6, 400 MHz, CDCl<sub>3</sub>



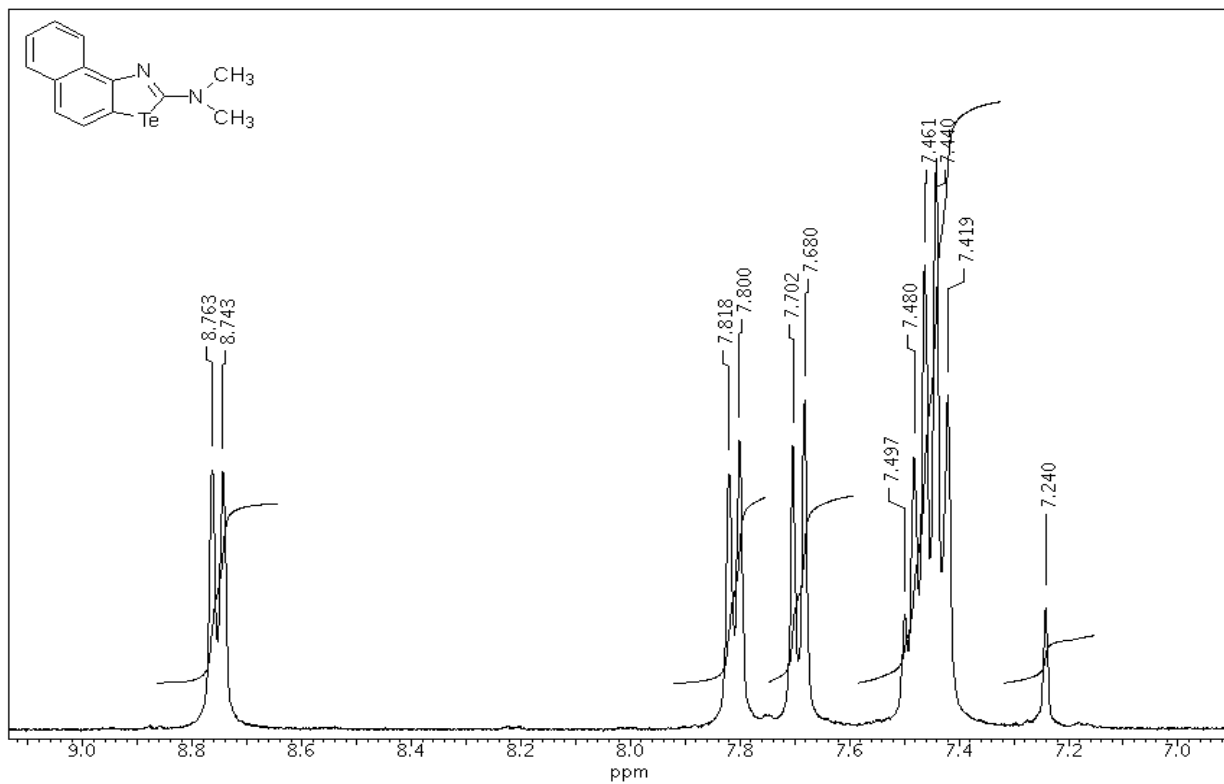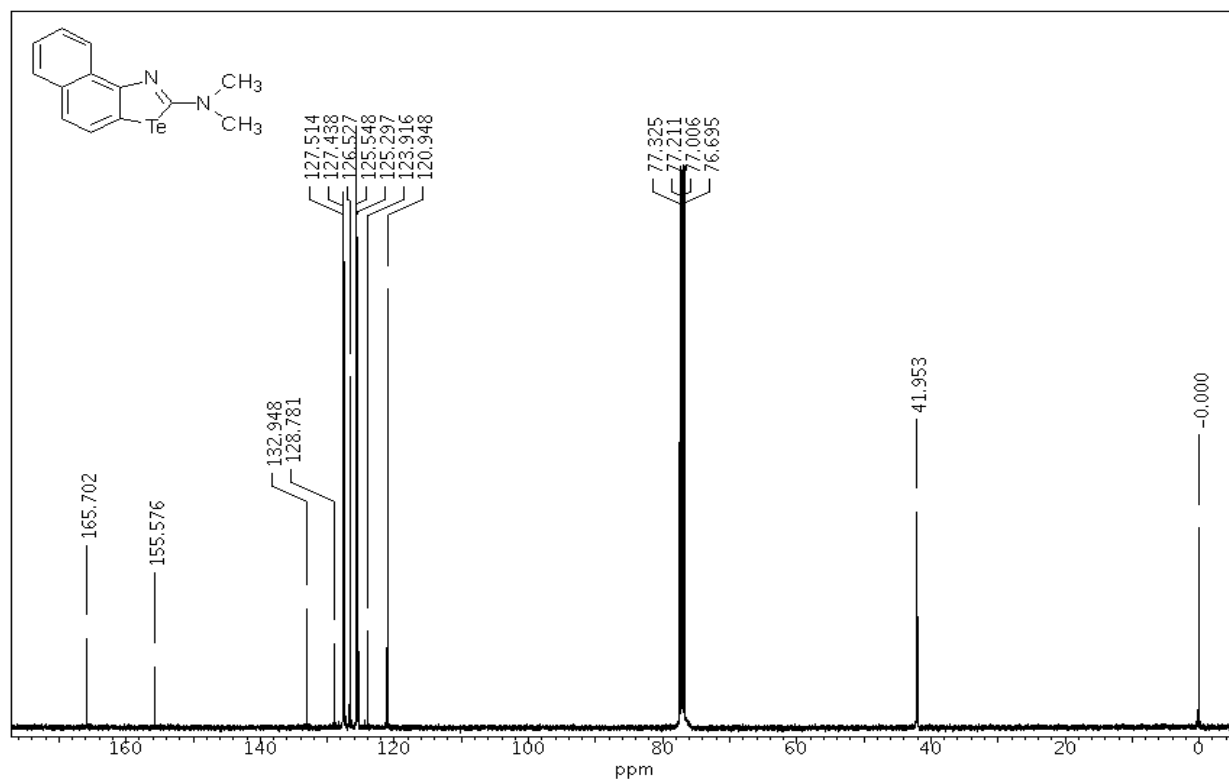

## $^{125}\text{Te}$ spectra of two representative compounds

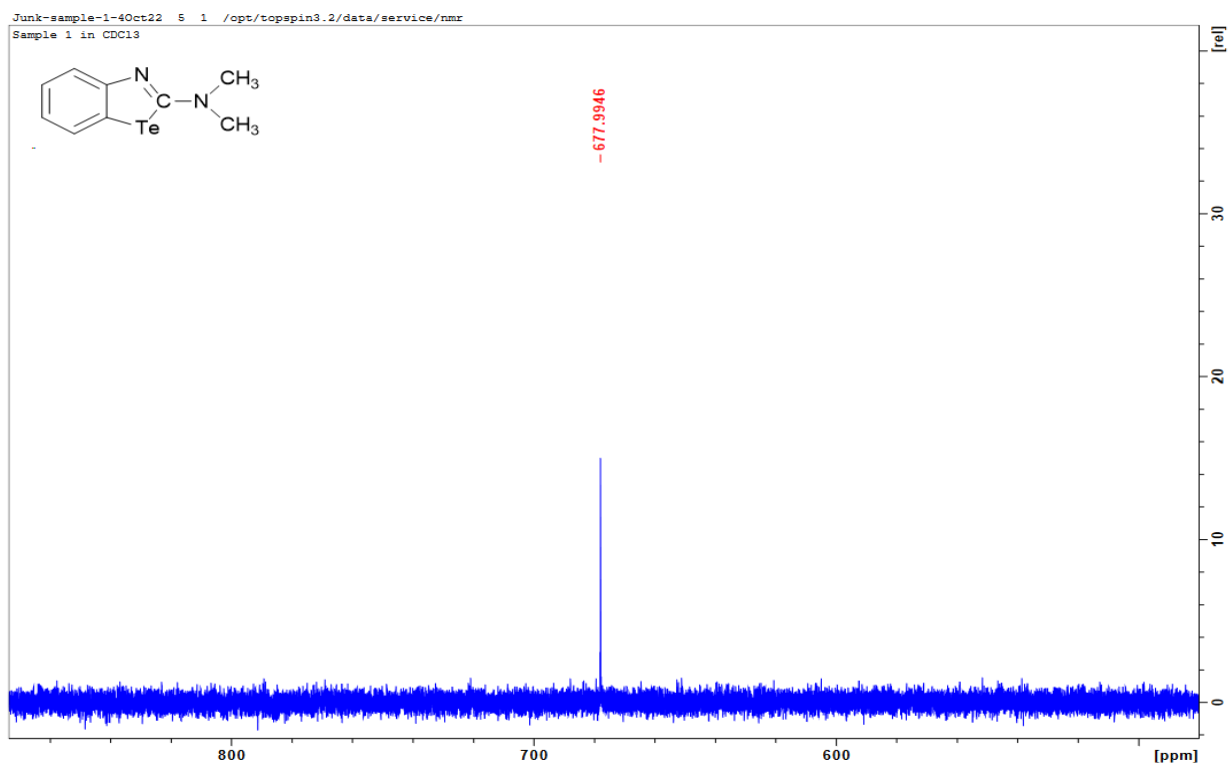

$^{125}\text{Te}$  spectrum of **1**, 400 MHz, CDCl<sub>3</sub>

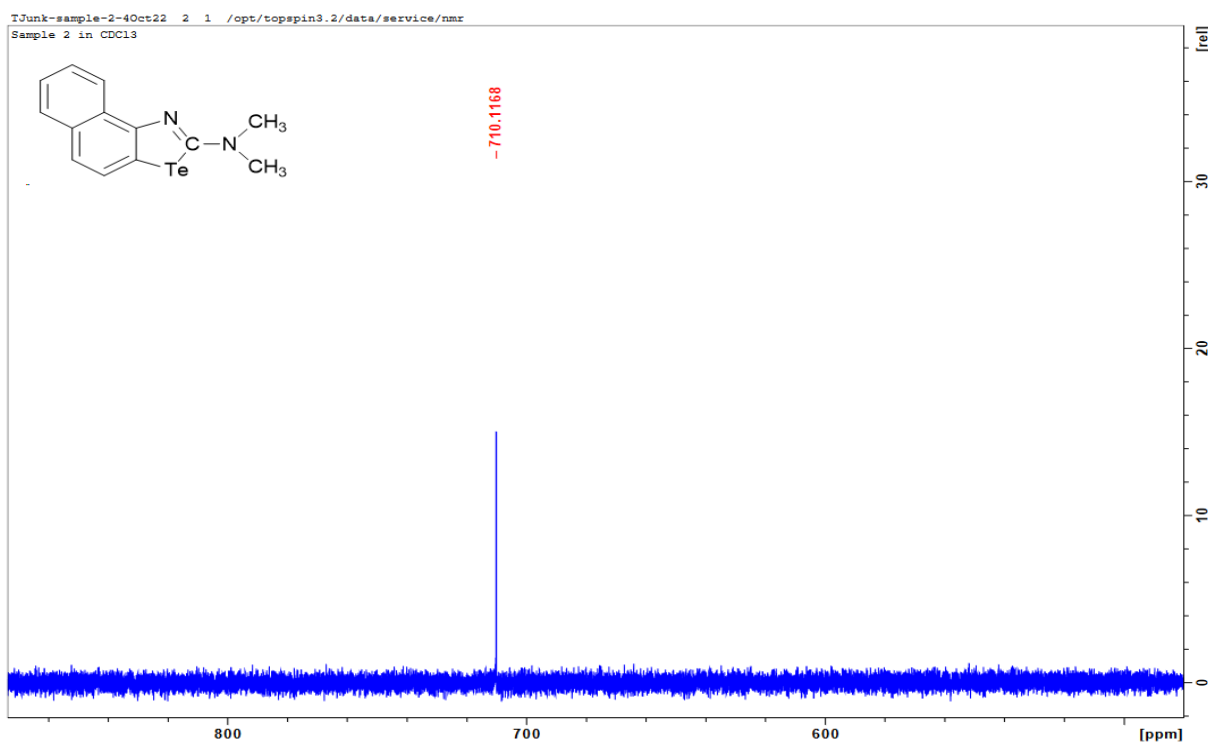

$^{125}\text{Te}$  spectrum of **6**, 400 MHz, CDCl<sub>3</sub>
